# Supplementary material for: Claudin-3 Loss of Expression Is a Prognostic Marker in Castration-Resistant Prostate Cancer
Source: MDPI journal article supplement (doi:10.3390/ijms24010803), 2023-01-02
Supplement: s1 [file s1]

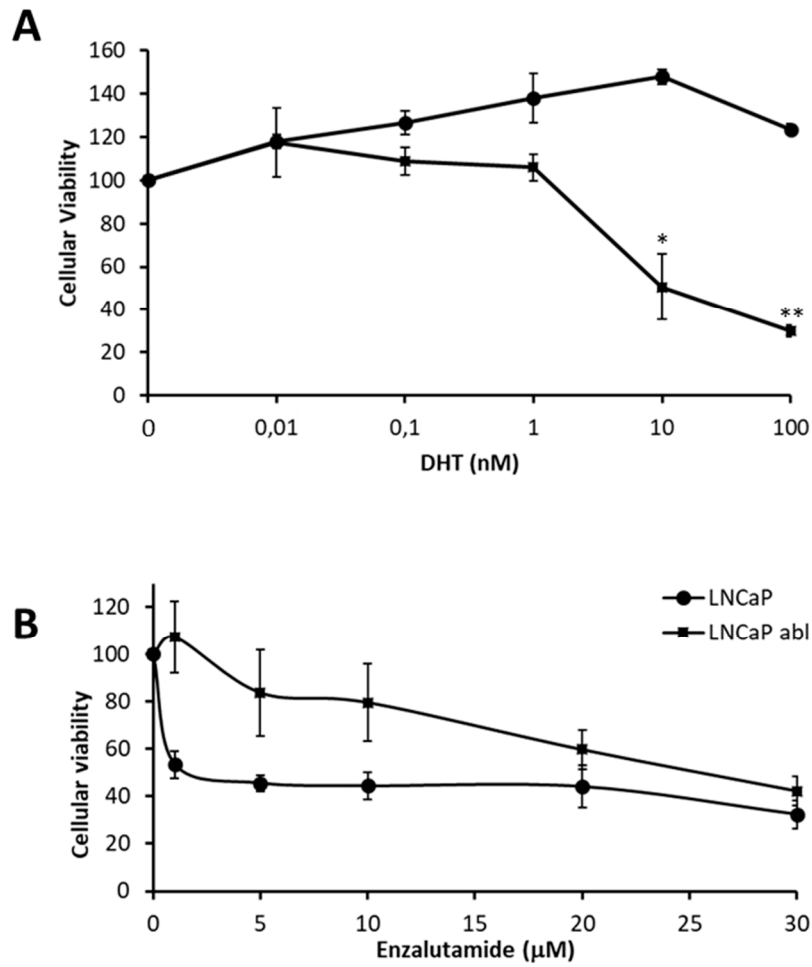

**Supplementary figure S1.** Effect of Dihydrotestosterone (DHT) and Enzalutamide on cell viability in LNCaP and LNCaP abl cell lines. Cell lines were treated with DHT for 4 days (**A**) or Enzalutamide for 5 days (**B**) at the concentrations indicated and cell viability was monitored by MTT assay. Data shown represent the mean  $\pm$  s.e.m. of three independent experiments completed in triplicate. \*  $p < 0.05$ ; \*\*  $p < 0.01$
