# Supplementary material for: Claudin-3 Loss of Expression Is a Prognostic Marker in Castration-Resistant Prostate Cancer
Source: MDPI journal article supplement (doi:10.3390/ijms24010803), 2023-01-02
Supplement: s1 [file s1]

**Supplementary table S2.** Array DNA methylation values of some of the CpGs analyzed by bisulfite sequencing for CLDN3, EGF and ELF5.

| Gene  | CpG position | LNCaP $\beta$ value | abl $\beta$ value | $\Delta\beta$ |
|-------|--------------|---------------------|-------------------|---------------|
| CLDN3 | -70          | 0.02                | 0.49              | 0.47          |
|       | -55          | 0                   | 0.61              | 0.61          |
|       | -41          | 0.05                | 0.69              | 0.64          |
|       | -16          | 0.01                | 0.52              | 0.5           |
| EGF   | 362          | 0.933               | 0.22              | -0.71         |
|       | 551          | 0.92                | 0.18              | -0.74         |
| ELF5  | -266         | 0.926               | 0.337             | -0.549        |
|       | -168         | 0.917               | 0.342             | -0.575        |
