# Supplementary material for: Claudin-3 Loss of Expression Is a Prognostic Marker in Castration-Resistant Prostate Cancer
Source: Int J Mol Sci. 2023 Jan 2;24(1):803. doi: 10.3390/ijms24010803 (PMC9820886; doi:10.3390/ijms24010803)
Supplement: Supplementary file 1 [file ijms-24-00803-s001.zip › Supplementary table S1.xlsx]

## Sheet: Hypometh_high_expre_genes
GENE NAME	UCSC_REFGENE_GROUP	RELATION_TO_UCSC_CPG_ISLAND	TARGET SEQUENCE
AMOTL1	Body		CCAGAAGGACCTGCCAACTTTCAGGGTGGGAGAGTGGGCCATGTTCCCAAAGAATGCCTG[CG]TGGTTTACTGAGCCTCACTGACTTTGGAAAGCAAAGCATGTGAGTGCTTAAGCCCACTTG
C3orf52	Body	S_Shore	TCAGAAGGGGAGAAGGGGTAGGGCTGGCGTAGAGATGGGGCGGGCGGGTTAGGGGGTCGG[CG]CGGGGGAGGTGAACTTGCCCTGCTCAATTGAAAGAAAATAATTTCAAAGTTCTTGTCTCG
C4orf19	5'UTR	S_Shore	ATTGACCTTGGCAGCCCTGATGAGGCGAGATTTTCACAAAGTACTGGTGAAGAATTTTTC[CG]GTGATAAAAGGCAAGGATCAATGCTTTTTACCCCAGCATGGCAATTGACCTTAAAAACAA
CCNO	Body	Island	GAGGCCGAATTGGCGGTGCACCGGGATCAGCCAGCTGAGCAGCTTACAGCGGGATTCCGC[CG]TCACCTGCCGGGAAGGAGGGGGGAGGCGGGCCCGCTGGGCTTAGGGTGGAGAGGGACTGT
CCNO	Body	Island	TTGGCTGCGTCCCCAGATGCCGCGTGTACCTGTTTGATACCCCAGGTACCTGTTTGCAAG[CG]ATGAGCAAGGAGGTGACCCCAAGCAGCTGGAAGCAGTCTGCAGCCACCGGCGTGGTGGTG
CCNO	Body	Island	GATATATGCGTATGCAAATGTCTGATAAAATGAGTTCTGGGAACCCAGCACTGAATCGTG[CG]CGCTGGAAAGACGGGCGGCCAGGGAGTGGCGGGGGAGTTTGGCTGCGTCCCCAGATGCCG
CCNO	Body	Island	CTGTTTGCAAGCGATGAGCAAGGAGGTGACCCCAAGCAGCTGGAAGCAGTCTGCAGCCAC[CG]GCGTGGTGGTGAGGAAGCGGTCCAGAGTGTTCACCGTCAGGCACAGCGACTCGAAGGAGA
EGF	1stExon		AAAATTTAGTTTTGTTAGTCTCTCAGCACCGCAGCACTGGAGCTGTCCTGAAGGTACTCT[CG]CAGGAAATGGGAATTCTACTTGTGTGGGTAAGTACTCCAATGAAAAGGTGCTCCAGGTCT
EGF	1stExon;5'UTR		GACAACAGCACAACAGGAGAGTAAAAGATGCCCCAGGGCTGAGGCCTCCGCTCAGGCAGC[CG]CATCTGGGGTCAATCATACTCACCTTGCCCGGGCCATGCTCCAGCAAAATCAAGCTGTTT
ELF5	5'UTR		GCCTGCGGAGGCAAGCAGGTCTCTCTGAGGCAAGCCGTCACATCCGTGTCAAACAGCTCC[CG]GAGGCCCTGGGACTGCACCCAGCGCAGGTGCCGGCCCTGGAGCTGGAGATGGACGAGCAG
ELF5	TSS1500		CCAGGGGACTCAGTAAACAAGCAGAAAATTCTTGTCCCTGGGAGCTGTGCGGGGATCGTG[CG]TTTGGTGAGGAATTTTCCTCTGTGCAAGCTGGAGGGGAAACACAGAGATTCCACCCTGGT
ELF5	TSS200		CCTTGGAGGGGGGGAAATGGTTCTCATATGCAGAAAGTTTACCTTTATCCTGCTTTTGTG[CG]CAGCTCACCCCTGCCCTGCAACCCCCCACTCCCAGCCCAGGGGACTCAGTAAACAAGCAG
ELF5	1stExon;5'UTR		TACGTGAGGGCAGCGGTGGCTAGGTCCAAAGAGGAGGCTTTCAAGGCAAGAGAAGGCAGG[CG]CTCCCAGCACCAGCGTGCAGTGGAAATAAAGACACCTGTAGCCTTGTGATATAAGTGACA
EPHX1	5'UTR		GTTTCTGGCTCTAAGCTGTTTTCCCAGGGCTTGGCTCCGGCGCTTGCACAGAGATAAACA[CG]GCCATTGGCCTGGTGCACAATCCCAGCTTGCCTGCATCCGGCCTCTTCCATCCTGAGTCT
EPHX4	TSS1500	N_Shore	TCACGGCTTCCAGCCCTTCGACGAACTCTCAGGTGTGTGGCCTTCTGGCCAGGCTTCTGC[CG]CGTCACGTTGTTGAAGCATTCGTTGTATCCCTGGGGTTGCAGCTCTCTGTAAGTTTGCTG
FAM49A	5'UTR		CTCACAGGAACCCAGGGCCAGCAGGAGGTGAAGTTCTGCCAGCCCCCAGCCTGGGCCCAG[CG]CCCATGTTTATGACTGTTTATTTCAGAGCAAGTAGAAAGGAGAAATTAGAGCCATGAAAG
FAM84A	5'UTR	Island	GCAGAGTGCACCTGCCTGTGAGGGCAGGTGTGCCCGGGTGCTTGGGCGTACGTGCAACGG[CG]AGCGTGCAAGCGTGGAGCTGAAATTGTGTACGAATGTGTGGGGTCTAAGTGTGCCAGTGT
GALM	TSS200		TCTAATTTTTTCCCAAGATCGGTCTCACTGTAAGTCTGCTATCTGTATTTTCCCATTCTT[CG]TCTGATAGCCACCGACATTAATGACCAGCTCATTACATGTTGAGGTGTGGGGAGATGGGG
GALM	5'UTR;1stExon		CCAGGCAGGGAAAGGGAGGAGTCTGAGCCGAGTCACGCCCCTTCTCCTGTAAACTTGGGT[CG]CCTCTAGCTTAGCGAGCGCTGGAGTTTGAAGAGCGGGCAGTGGCTGCACACGCCAAACTT
GALM	5'UTR;1stExon		GGAGGAGTCTGAGCCGAGTCACGCCCCTTCTCCTGTAAACTTGGGTCGCCTCTAGCTTAG[CG]AGCGCTGGAGTTTGAAGAGCGGGCAGTGGCTGCACACGCCAAACTTTCCCTATGGCTTCG
GPC6	Body		AGACACTATTGTCAACATTGAGACTTCTGTACCCAAAGGTTATTTTAGAGAAAGATTCAT[CG]TTATGTTTGAAGCTGGAAGATAGAATGCACTCAGCTACATGTGCTTTCTGTGAAATGTAG
GUCY1B3	TSS200	N_Shore	TCATTGTTATGGCCTCAAATGAAGGCCTTGTCACCAGGCGGGGGCGGGAAGGCACTGGAG[CG]CAGCAGCATTGAGAGCATCCGAATTCCCTCCTCTGTCCCTGATTGGTTGAAGAACTGGGG
GUCY1B3	TSS200	N_Shore	CACGGCTGGGGCTTCTCCACTGTCATTGTTATGGCCTCAAATGAAGGCCTTGTCACCAGG[CG]GGGGCGGGAAGGCACTGGAGCGCAGCAGCATTGAGAGCATCCGAATTCCCTCCTCTGTCC
GUCY1B3	TSS200	N_Shore	AAGGCCTTGTCACCAGGCGGGGGCGGGAAGGCACTGGAGCGCAGCAGCATTGAGAGCATC[CG]AATTCCCTCCTCTGTCCCTGATTGGTTGAAGAACTGGGGAGCACCGACCAGCCCCCTGCG
GUCY1B3	Body	Island	TGGGAACGCCGCGAGTCGTGGCGGGGGCGATCGGTGCCTTTGCTTCCCAGGCGGGTTTGC[CG]CTCCACACCGCAGCTTCCTGAGCTCGGGAAGGGGAGGTGCGGCGGAGGCGTGGGGTCTTC
GUCY1B3	Body	Island	GGCCGGCCTGGCAGCGAGGGAACTGGCCGCGCAGCCGGAGCTTGGCTCGGGGGCCCTGGG[CG]CTCACTGCCGGCCACGGGAGCAGCCTCACTCCTTGCCCGCGCCCAGTCAGGGGAGGTGGG
GUCY1B3	Body	Island	AGATAGCGTGGGGGTGGGGCGGATGGTGACGGGGAGAATCCACCAGGGATTGGGGGGTTG[CG]CCCCCACGATCCGACTCCTTTAGTGCATAGTACCCCTAAGGGAGAGGAGTCAGGGGCGGG
GUCY1B3	1stExon;5'UTR	Island	CGGCCCGGTTGCGCTGTAGCCGCTGCCGCCTCTGCCTGGGTCCCTTCGGCCGTACCTCTG[CG]TGGGGGCTGCCTCCCCGGCTCCCGGTGCAGACACCATGGTAAGTGCTCTCAGCCGGGTGC
HYI	5'UTR	Island	TGGTTAGAAAAGCGAAGTGCTGTAAAAACCCGGGCCTTCACGAAAAGCGCCTACGGTTAG[CG]AGAGAGGGATCACGGGGAGAGGCGAAGGGGCGGAGCGAGGGCGGCCGGAAAAGGAGCAGG
HYI	5'UTR	Island	GGCGGCGGGCGGCGGGCGGCGGGCGGGGGCGGGGCTCTCCTTGCTGGCCCTGCGAACGAA[CG]AGCACTGTTCGTGGTTAGAAAAGCGAAGTGCTGTAAAAACCCGGGCCTTCACGAAAAGCG
HYI	5'UTR	Island	GCGGGCGGCGGGCGGGGGCGGGGCTCTCCTTGCTGGCCCTGCGAACGAACGAGCACTGTT[CG]TGGTTAGAAAAGCGAAGTGCTGTAAAAACCCGGGCCTTCACGAAAAGCGCCTACGGTTAG
HYI	5'UTR	Island	GTCTCCCGGGGACGGCCCCCAGCCCCATTTCCCCCTTCTCTTGGTCTCCTGCAGAGAGAA[CG]GGCCTCAGCCCCCGGCTCGGACACTCCCCTGCCCGCGCCCCGGCACCCCCCAGCCCTCCC
HYI	TSS200	S_Shore	ATTCGGTATATGCTGTTTTATAGCTCTTTTTCATGGAATATTATTTTGTGAGCATTTCCT[CG]TGTTTTCCAATAGCCTTCAAAGTCAGTGCCTTCGCTGCTCATTGTCGCACACCTAAGCAG
HYI	TSS200	S_Shore	ACCAAATAAAGAAGCACTTTTATACCGCCAGTTATCACACCACTAGCCTGTTGGCTTTCC[CG]TCCAAATTTTAAAATATGCAATTTTTTTCTTTGGAAATTCTGATCATTCGGTATATGCTG
HYI	Body	Island	TCACAGGGGTGGGGGTGGGGTGGAGCGGGGTACCTGGGACAGCCCAGGGCTTTGGCATAC[CG]CACGGCCTGCTCCAGTCCCTCTCGGAAGGCCGCCTGTCTCCCGGGGACGGCCCCCAGCCC
HYI	1stExon;5'UTR	S_Shore	ATGATGGGACGCGCACTTTAATACTGAGTCTTTCCTCTGATTATAAAAATGCTATCTGTT[CG]TTAAGCAACATTTGAAAGCTGTATGACCAAATAAAGAAGCACTTTTATACCGCCAGTTAT
HYI	1stExon;5'UTR	Island	AGCCGGACGCGAAGCAAGAGAGAGCTGGCTGCCCGAGGGCCCGGTTGCAATGATGGGACG[CG]CACTTTAATACTGAGTCTTTCCTCTGATTATAAAAATGCTATCTGTTCGTTAAGCAACAT
KLRG2	TSS1500	Island	GGGAGGGAGCTGAGAACGGCAGCGGGGCCAGGCGAGGGTTGCAGGGTGGGCGGGAGCTCT[CG]GGAGAAAAGCAGAACACCAGCGGAGGCTTGTGGCAGGGAACCCGGAGCCCCGCCTGACCC
LEKR1	5'UTR	S_Shore	GCGGTTGGTTTCTGTGTGGAAGAGCCTGCCGCTTCAGGAAAGTCTTAGGATGTGAACTCC[CG]CCTTCACCTGCCCCTGACCTGCTCGTTGTGGGTGATTCACGCCATGGGAATGGTTCTTTA
MALL	Body	N_Shore	CAGGATCCCCAGGGATCAGGGCCACGACTCAGTCGTAGGGCGCCCCAGAGAGTAACACAG[CG]ACAGGTTCTCATTTGCAACCAGGGTGCCGCACACGACTGTTTTATGGCAGATGTTGCCAT
MALL	Body	N_Shore	CAGATGTTGCCATAGCTACCTGGTGTGGGAGACCCCACAAAAGTCAAAGTTCAAAGTCAG[CG]GACGTGACAATTAAGAAAACACTGGAAGACCTACTCTCAGAGGGAAACACAGTCTCCTCA
MALL	Body	N_Shore	TAGGGCGCCCCAGAGAGTAACACAGCGACAGGTTCTCATTTGCAACCAGGGTGCCGCACA[CG]ACTGTTTTATGGCAGATGTTGCCATAGCTACCTGGTGTGGGAGACCCCACAAAAGTCAAA
MYT1L	Body		TCCTTATTATCCCACGCTGAAGGAACAAATATTTAAGATCTGACACACCTTTCTAAACTT[CG]GCAAATCAAATTTACCTTTTATTAGACATAGAGAATCGCTAATTGTGTGAAACAAATATT
MYT1L	Body	N_Shore	AAGAATTGAAGAACCAGAAATTGGGCAATCTCCTGCCATGCTATTGGGTCTTGTGGAAAT[CG]CGGGCCCGGCGCTGGCACACGGGTGGGTCCAGGTGGGAGGCCACTCTTCTCCCTGGCTTT
MYT1L	Body		TCCGGCGCAGGCGGAAGATACTGACTGAGCATAGAGCTGCCGGGGTGAGTGCGATCGCTG[CG]GGGAAAGGTCACAGTGACATCCTGAGGCGGGAAACTGGACCTTTAGAGAGTCGCACATTG
MYT1L	Body		TTCTCACTTGCCAAACGGAGGTGACAACACCTACTCCCACCTACACCTCAGGGCATTGGG[CG]TAACAGGAGGGAGCTCTGCCGGTTTTGCACGCGAGAGCTTCCACACGTGTGCACAGGGTG
MYT1L	Body	Island	CAGACGCGGCCACTCACCTGCGGTGTGTGAGGAAGCTGCCGCTGACGTGGCCTGAGCCGT[CG]CATCCTGGCGTGGGGCAGGACATGCCTTCCGTCTTGACCGACTTCCAGGAGAACTGGGAG
MYT1L	Body	N_Shore	GTCACCAGGAAAGACGCTGGGGGAGGTTTTGTTGACAGAGAGCGCGGGAGCGAGCGCACA[CG]GATGCGTGCATGTCGGGGGTGAACATGGCAGAAAAAAGCAGCCTCCCAGCCCCATTCTTG
MYT1L	Body	N_Shelf	CGTCCTCGTCTATCCTCCGGGGTTTCATTTTGGTGTAGTCTACGGGCAAGTCCCAGCAGT[CG]CCCTCGCCCAGCTGGAAACACCGGTTGTTCATCACTGCCTGCTGCTGGGGGGACATGGGC
MYT1L	Body		GACGCTATGCACGGGAGTGACCCACACCCGAGAAACCCCAGGCCATCACCTCTTCTCCCC[CG]AGACATTCCCATTCACGCGCATGGCTGATCACGTGCACCCGGGTGCTCTCGGGTGAGCCA
NKX2-3	Body	Island	AGGGTCCCACAGCGCCAGGAGCCACAAACGTTCCCAAAAGTCCAGCCATTTACTACCGCA[CG]CTCTGCGCAGCCACCAAAAAGGGTCACGGTGCTCCAGGACAGGAGCCGCGGTGCGGCCGG
NKX2-3	Body	Island	GGCCGGAGGCGGCCCCTTTGTGAACGTGAGCAACCTAGGAGGCTTCGGCAGCGGCGGCAG[CG]CACAGCCGTTGCACCAGGGTACTGCAGCCGGGGCCGCGTGCGCTCAGGGCACCTTGCAGG
OR51E2	TSS200		CAGAAGACTTCTTTTGCCTCATACAGTCCTTTTATATCTGTTCCATTATGCAATTACTTA[CG]GTGGCTATGTGCTTTATGGGCTGATGTAACCTTTTTTTCATGTGTCATTTCACTCAAAAG
POPDC3	TSS1500	S_Shore	AGGCAGGAGCGATGGGCTGGCTGCTGAACCAAGGCAACTGCACGCCTGCTCTCTCACCCC[CG]CTCCACACACACCGTAAACAAAATGAAGAGGTAAATCACCATAGTGGGGACGGGAATATT
SLC25A43	TSS200	N_Shore	AAGCAAGATGTCTAGCAGGCTGGGCCTTGAGAGAACAGTAACTGTTTCGCAACTGAAAGT[CG]CTACTCGAGCCTTGCCAACTGGGGAGACTATGCCCATGATATCCGCGGCCTCGGACCCCG
SLC25A43	TSS200	N_Shore	CTGAACATTTAGGAAGCAAGATGTCTAGCAGGCTGGGCCTTGAGAGAACAGTAACTGTTT[CG]CAACTGAAAGTCGCTACTCGAGCCTTGCCAACTGGGGAGACTATGCCCATGATATCCGCG

## Sheet: Hypermeth_low_expre_genes
GENE NAME	UCSC_REFGENE_GROUP	RELATION_TO_UCSC_CPG_ISLAND	TARGET SEQUENCE
AHNAK2	Body	Island	CAGGTAGAACGCGAGGCATGGGAGAAGAGACTCCAGCGGCCGGGAAGGCCCAGAACCACG[CG]CGAGTCCCGCAGGCGTCTCCGAGTCCCCCGCCCCCAAGGCCCGCACTGCGCGCCCCTGGA
AHNAK2	TSS1500	Island	GGAGACAGACACTTTAGTCAGAAGCTGGGGTGGGGGGCAGCCTGCGGGGACAACAGGGGT[CG]CGGGCACCGCAGGAGGTGATCTGGCAGCATAAGGACAAGATAGAATTCTGCAGGGGCTGG
ANKS1B	Body		TTTATGAAATACCCCTGACCCCACAGTGCCATGTATAGAATGAATGTATGAGTGTGTGTG[CG]TGTGTATGCATGTGTGAATCATTCTTTCTGATATACCTTAGAGTTCATTTCAAAAGTATG
ANKS1B	Body		TGCTACAGGCACATCTGCTCTTTATAGTGAAGATTGGCCCCAGGTGTCTATACTGCTCTC[CG]CCTGGGAACTGGTGAAAGCAGGTATATTCCTAGCTATGTATCTCTAGACTTCACCCTGGT
ANKS1B	TSS1500;TSS1500;Body		TTTTTTTGTCTGCAAGCTGTAAGCCTGCTGCTGCTGCTTCCTCCTACACACCCATCCAAG[CG]TCAATCTTGAATGATGAGAGCAGTCAAAACAAATGCAGAAAATAGCAAGATTCAAAAGCA
ANKS1B	TSS1500;TSS1500;Body		TTACGTTTCAAAAGACACCAGGAAATGCGAAGCTTGAACTATAGCTTATAACAGAGCTCA[CG]ACAGGTTCCCTTTCTCCTTTTCCTTTCTTTCCTGTCTTTTCTTCTTCCTTTTTAAATGGA
ANKS1B	1stExon;5'UTR;5'UTR;Body;1stExon		GAGTATGACTTGATCCTAGCTCCACATTTCTTACATATTAATCTTTACTACCGACCAGTA[CG]TCATACAGCCCCCAAAACCAGGCAGCAGAAGAAGGCATATCAAGCTGTCAGCTTGGGCTG
CDC42EP3	5'UTR	N_Shore	AACGTCTCAGCTGTTCACCGTCAAAAAACAAAAAAGTCAATATCCAGATCTGCAGGTTGG[CG]CCCCACTAACAATGTCCTCCATTAAGAAAGAGGAGGGCACCGGGCAGGCGATGCCACGGC
CLDN3	1stExon	Island	GTGGCAGTGCCAGCAGCGAGTCGTACACCTTGCACTGCATCTGGCCGGTGCTCTGCACCA[CG]CAGTTCATCCACAGGCCCTCCCAGATGTTCTGCGACGTGATGATGTTGCTGCCGATGAAG
CLDN3	TSS1500	Island	CGGTCCTTGTCCCTCTCTGCTCGGGAATGAATTCTCCGGGGCAAAACCGAGGACGGGATG[CG]TCAGGGGCTTGGGGTGCAAATCCCAAAGAATTTGACACGGCTTCTCTCTCCTCACCACTT
CLDN3	TSS200	Island	TGCACCTGCCTGTGGCTTTGTGGGCGGGCGGCGGCGACTGGGCTGGCCCTGGGCTGGGGC[CG]GTGCGTCTTAGCTAAGTGCCCAGCGCTCCGGTGGGGGCGGTAGGGGCGGAGCCGCGCTCT
CLDN3	TSS200	Island	GGGCGGCGGCGACTGGGCTGGCCCTGGGCTGGGGCCGGTGCGTCTTAGCTAAGTGCCCAG[CG]CTCCGGTGGGGGCGGTAGGGGCGGAGCCGCGCTCTCCAGGGCCTAAGGACAGTGACGTGG
CLDN3	TSS200	Island	GGGCTGGCCCTGGGCTGGGGCCGGTGCGTCTTAGCTAAGTGCCCAGCGCTCCGGTGGGGG[CG]GTAGGGGCGGAGCCGCGCTCTCCAGGGCCTAAGGACAGTGACGTGGCCCCTGCCTCCCAC
CLDN3	TSS200	Island	TGGGGCCGGTGCGTCTTAGCTAAGTGCCCAGCGCTCCGGTGGGGGCGGTAGGGGCGGAGC[CG]CGCTCTCCAGGGCCTAAGGACAGTGACGTGGCCCCTGCCTCCCACCTTCACCGAGCGTCC
CLDN3	5'UTR;1stExon	Island	GGCGCCCCGACGGACGGACGGACGGACGGACTGACTCACCGACGGCGCGCGCTAACGGCT[CG]GCTCCATACGCTCTCGCCGCGGCTGCGCCTGCACCTGCCTGTGGCTTTGTGGGCGGGCGG
COL6A1	Body	Island	GGGCAAGTCCAGCTGTGTGTCAGCCACGGCCAGGGTGGGGCAGCCTGTCCATCTGGGTGA[CG]TCGCGCCCTGGGACGGGTAGCGATGGCGCCAGGGGCCGCCCGCCTCACGCCCGCCGTGCC
COL6A1	Body	Island	GTGACGTCGCGCCCTGGGACGGGTAGCGATGGCGCCAGGGGCCGCCCGCCTCACGCCCGC[CG]TGCCTGTTCCTGGCAGGTACTACCGCTGTGACCGAAACCTGGTGTGGAACGCAGGCGCGC
COL6A1	Body	Island	CACGCCCGCCGTGCCTGTTCCTGGCAGGTACTACCGCTGTGACCGAAACCTGGTGTGGAA[CG]CAGGCGCGCTGCACTACAGTGACGAGGTGGAGATCATCCAAGGCCTCACGCGCATGCCTG
COL6A1	Body	Island	GTGTGGAACGCAGGCGCGCTGCACTACAGTGACGAGGTGGAGATCATCCAAGGCCTCACG[CG]CATGCCTGGCGGCCGCGACGCACTCAAAAGCAGCGTGGACGCGGTCAAGTACTTTGGGAA
EFNA5	Body	N_Shelf	TGCCAGAGGACTTGGGAGTGTTGACCTAGAATTCACATTACTTTCACAACTCCAAGATTA[CG]TGTTAACAAAACTAAAAGGTGTCAATTACCTGCTACTCTAATATGAAATGTTTAATATAC
EFNA5	Body		CACTTGTGTGCCAGGGCAGTGGCCATGCTGTGCAAGTCAGAGGTCACCGCTTCCACATTC[CG]ACATCTGTCTGTATTTTCTTGCCCTGAAACAATAGAAGGGGAACTAGGCTCATTTGCTCC
EFNB2	Body	Island	GTGTCGACTGGGCAGGGCCCTAAGCTTTTATAGGAAGTGCATTACAATCAGGTCGGCCAT[CG]AGACCGCATACTCCGGGGCTACCGGCTTATGAACGAAGCGGGAGGCCGAGGTGCGGCGGG
EFNB2	Body	Island	GGCTTATGAACGAAGCGGGAGGCCGAGGTGCGGCGGGCCCTCAGGGAGAAGCCTAAGGCC[CG]TCTCCCCGGCGCGGAGGAAAGGGCTCGACGCCCGAGTTCTCCTGCGAAGCAGGCGAGCTC
EPHA6	1stExon	S_Shore	AGTCCGGGAATTTCTTTTGCAATTTGGTTTCTTCTTGCCTCTGCTGACAGCGTGGCCAGG[CG]ACTGCAGTCACGTCTCCAACAACCAAGGTAAGGGACGGGGCGGAGGAGCGGGAGTGGGTG
EPHA6	Body	S_Shore	CAGGGGTCAGAGTCTCCTGGCTCGCCACACGAGGGGATCGAGGATGTCCCCTTACCCTAG[CG]CCCTGTTTACACCGCCCGGGACGGTGACTCCACAGGCTAGGATCCGTTGTGTTTCTAAAT
IL1RAPL1	TSS200		ACCTTCCCAAACAGCAGGGGTTGTGTGCTTTCACATAGCAGTACTGTACAAGGAAAACCC[CG]TCGGATCTGTTATTGCGGGATACTTGTGAAATATACATAGGATTCTTTCTTATGGCTGCA
IL1RAPL1	5'UTR;1stExon		TGAAAGGCTGCATGTACTCAGAAGATTTGCAAGCAACACTCCAATTCTTGTCATAGAGCT[CG]CAGACTTCTCACTTATCGGCTTTTTTCCTTCCTTATTTTTTAAGAATTATTCTTATTTTC
LAMB2	TSS200		CAACACCGGGCGGAGAGCGCCCCCACCCCAACCCTACCCCTTCCCTCCGGAAACTGCCTT[CG]CCCCAGGAACCAGAGACAGACCACTTCACCCACAAATCTTTATTGTGCCCCCAAGCCCAC
LAMB2	1stExon;5'UTR		GTCTGTCCAGCGGTCCCTCCGACAGCTTAGAGTCCAGCGACTTTGAGCAAAGTTGGGAAT[CG]CGGCAGGAAGGAAAGGCCGGAGCGGATTCTGGGAAGGAGCGCAACACCGGGCGGAGAGCG
MAN2A1	Body	S_Shore	TTCTTCAGCTATTACATCTGGTTTGTTTGTGGCAGACAGGGGGAACCGAGTGGGGAAGCG[CG]TGTTATACTCCGGCCGAAAGCTGTGGGGCGCTCAGTCCTGCGTCCAGTGGTTAAATTGGT
MAN2A1	Body	S_Shore	TCTGGTTTGTTTGTGGCAGACAGGGGGAACCGAGTGGGGAAGCGCGTGTTATACTCCGGC[CG]AAAGCTGTGGGGCGCTCAGTCCTGCGTCCAGTGGTTAAATTGGTAAATGAGTTGGGAAGA
MAN2A1	Body	S_Shore	GGCAGACAGGGGGAACCGAGTGGGGAAGCGCGTGTTATACTCCGGCCGAAAGCTGTGGGG[CG]CTCAGTCCTGCGTCCAGTGGTTAAATTGGTAAATGAGTTGGGAAGACGACCCATCCAAAG
MARCKS	TSS1500	N_Shore	AACACACGGAAAGATGGGGGAGGGGAGCGAGTGGAGAGAGAGAGACACACGGATATAGAC[CG]ACGAGAGTCAATGCGAGTCAAGTTAACGCTTTCTCCGCCCCGATGCACAAGTACCCCCCT
MARCKS	TSS1500	N_Shore	GAGTGGAGAGAGAGAGACACACGGATATAGACCGACGAGAGTCAATGCGAGTCAAGTTAA[CG]CTTTCTCCGCCCCGATGCACAAGTACCCCCCTCCCGTGTTAATTAATTCCAAACAAAGCA
MARCKS	TSS200	N_Shore	TTATTTATTTGGAGGACATTAATTCTCGGTCTGAGGCTGATTTTCAAACCGTTTGCAAAG[CG]CGGCTCCATTGTTCGCCAGGCGCGCAGACCCCGCCCCCTGCTTTGTGTGCGGCGCGCGGA
MARCKS	TSS200	N_Shore	ACATTAATTCTCGGTCTGAGGCTGATTTTCAAACCGTTTGCAAAGCGCGGCTCCATTGTT[CG]CCAGGCGCGCAGACCCCGCCCCCTGCTTTGTGTGCGGCGCGCGGATTGGCCGACGCGCGC
MARCKS	TSS200	N_Shore	CCCCCTGCTTTGTGTGCGGCGCGCGGATTGGCCGACGCGCGCGGGGGCCGCGTCAGCGCC[CG]CGAGCCCATTCATCTGTGCACTTGGGCGTTGGACCCCGCATCTTATTAGCAACCAGGGAG
MARCKS	TSS200	N_Shore	CCCTGCTTTGTGTGCGGCGCGCGGATTGGCCGACGCGCGCGGGGGCCGCGTCAGCGCCCG[CG]AGCCCATTCATCTGTGCACTTGGGCGTTGGACCCCGCATCTTATTAGCAACCAGGGAGAT
NCAM2	Body	S_Shelf	TATCTAGTACAATTTCACAATGTGTGGCACTCATAGAGACACAGATATATATCAGAGAGA[CG]TAGCTTTTGTGAAAGGGAACATATAGTACTTCTATGCCATGTGTCCTGATGAAGTCAGAG
PHLDA2	TSS1500	Island	CAGAGACCCTCTCCGAAAGTGGCCCTGCCCTAGCGGACCGAGCTCCTATCTTGCCACCCA[CG]GGCTGCGCCAAGAACGACCACCTCTCTTAGCCTCGGTTTTCGCTTCTGTGAAATGGGAAC
SEMA4C	5'UTR	Island	GAGGGAGGCAGGAAGTGGGTGGGATGGGCGTGGAAATGACCAGGGCCTCATCCTGTTCCT[CG]CACTGCCTCCTCCGAAACACCAGCCCTCTGGCGGAGGGGCGGTGGGGGGACCGAGCTCGG
SEMA4C	5'UTR	Island	TCCTCCGAAACACCAGCCCTCTGGCGGAGGGGCGGTGGGGGGACCGAGCTCGGGTCGAGT[CG]GGGACTCCGGCGGCGCGCGCAGGCGACGGGGGGAGGTAGGGGCGGGGACGCGAGGGGGTT
SEMA4C	5'UTR	Island	CTGGGCGGGCCAGCGGGATTGGCTTCCCCTGCTCCAGCCTTCCCGTGCCAGGGGCGGAGA[CG]CAGAAGCTGGGGACCTGCTCACCCCCAAACAAAGGGTCCCCGCCAAGACCCCGTCCCGGG
SSH3	Body	Island	GAGGGGGCCCCGGGGCTCGGGCTGGAGGGCGCTGGGGGCCTCGAGGGTCTCTGGTACTGG[CG]CCGGGGCACAATCCAGAGCCCTGCGCGCCGCCCGGGCTGCGGAGGCCCCGATCTGAGCGC
SSH3	Body	Island	CAGGACCAGGCGGTCCAGCGAAGGAGTCGACTCCAGCGAAGGTGAGCGCCACCTCCCCCA[CG]CAGACACTTCCGTCTGCCCCGGGCCTGGCCACGGCCGTCCTGGGCTCCAGCTGCAGGGAC
STXBP5L	Body	S_Shore	GTGGTAGCAGCAGTGGCAGTAACAGTGGTGGTGGGGCTGGAAGTGGTTCCGTACATCCGG[CG]GGGACTGCAGGGGTTCTCAGAGAGGAAATTCAGGAAACTTTGACTTCGGAGTATTTCCAG
SYT4	Body		TTTCACTTTATGCTTCTTCTCTGGGAGGATCGTCATTTTGATATATGGGTCAGAGGTCAT[CG]ACTGCTCATCCATGGCTGGCAAGCCACGGGCTTCCTTGATATTGACCACAAATGCTTTTC
SYT4	TSS200		GACCACTAGAGATTAGCTTTGCTGTTTTGTGGGGGCTCAGAGGCTCACCGAGATAAGCCC[CG]AAACTGATCCCTGTCAGTTCCTAATATAAAATCTCCTGATCACCTAGATGAATAAAAATA
THBS1	5'UTR	Island	GGCTTCAGTCCCTCTGGTGGACCCCGGAACCTACACTCTCCCCGCTCGCCTACCCCAGCC[CG]CTCCTCTCAGCCGCTGGAGGACTCTTCAGGGCAAGGCTCCAGAGCCATCCTCTCCAGCCT
THBS1	TSS1500	Island	CAGGACAGGCGCTCGGGGGACGCGTGTCCTCACCCCACGGGGACGGTGGAGGAGAGTCAG[CG]AGGGCCCGAGGGGCAGGTACTTTAACGAATGGCTCTCTTGGTGTCCCCTGCGCCCCGTCG
THBS1	TSS1500	Island	GCCCAGTCTCTAGTATCCACCTCTCGCCATCAACCAGGCATTCCGGGAGATCAGCTCGCC[CG]AAAGCCCCTGCGCCACCCCGCGGGCCCTCCTAGGTGGTCTCCCCAGCCCCGTCCCTTTTC
THBS1	TSS1500	Island	CCGAGCCCGCGTGGCGCAAGAGTACGAGCGCCGAGCCCGTGCGCGCCAAGGCTGCGTGGG[CG]GGCACCGACTTTTCTGAGAAGTTCTAGTGCTCCCAAGCCCCGACCCCCGCCCCCTTCACT
THBS1	TSS1500	N_Shore	GAAGACTCTGGAGCCAGATGGTTCTGCAAATTCTCCAAACAGGAGTCACGTTAAGAAGCA[CG]AGTGGGCACAAAAACTGTTTTTCAAGACACAATTTCAATTTGGCTTGTGGAAACTGGATA
THBS1	TSS200	Island	GGCAGCGGGGGGCGGAGAGAGGAGCCCAGACTGGCCCCCACCTCCCGCTTCCTGCCCGGC[CG]CCGCCCATTGGCCGGAGGAATCCCCAGGAATGCGAGCGCCCCTTTAAAAGCGCGCGGCTC
THBS1	TSS200	Island	AGCGGGGGGCGGAGAGAGGAGCCCAGACTGGCCCCCACCTCCCGCTTCCTGCCCGGCCGC[CG]CCCATTGGCCGGAGGAATCCCCAGGAATGCGAGCGCCCCTTTAAAAGCGCGCGGCTCCTC
THBS1	TSS200	Island	TGCCCGGCCGCCGCCCATTGGCCGGAGGAATCCCCAGGAATGCGAGCGCCCCTTTAAAAG[CG]CGCGGCTCCTCCGCCTTGCCAGCCGCTGCGCCCGAGCTGGCCTGCGAGTTCAGGGCTCCT
THBS1	TSS200	Island	CCCGGCCGCCGCCCATTGGCCGGAGGAATCCCCAGGAATGCGAGCGCCCCTTTAAAAGCG[CG]CGGCTCCTCCGCCTTGCCAGCCGCTGCGCCCGAGCTGGCCTGCGAGTTCAGGGCTCCTGT
THBS1	1stExon;5'UTR	Island	TCCCCAGGAATGCGAGCGCCCCTTTAAAAGCGCGCGGCTCCTCCGCCTTGCCAGCCGCTG[CG]CCCGAGCTGGCCTGCGAGTTCAGGGCTCCTGTCGCTCTCCAGGAGCAACCTCTACTCCGG
THBS1	1stExon;5'UTR	Island	CGCCCCTTTAAAAGCGCGCGGCTCCTCCGCCTTGCCAGCCGCTGCGCCCGAGCTGGCCTG[CG]AGTTCAGGGCTCCTGTCGCTCTCCAGGAGCAACCTCTACTCCGGACGCACAGGCATTCCC
TMEM184A	Body		CATGTGGTCCATCTGCGGCCCAGCTGGCACAGCCGGTGGGGGGCTGGGCTGCGGCCAGTT[CG]CTGACACCAGGGGGACGCCGGCTGTCTCCAGGATCCCTGAGACATTACTCATCTGCAGAG
VAC14	Body		AATTAGAAAACAAAAATCAAACACTCATATTTCAGTGAGAGGTCACAAAATATGTATCCC[CG]AGTCTTCTAGTTTCTCCCAGTAAAAAAAGCTCCTCCCTTTGAAGGCCCGCACTAGCTTAT
ZNF85	TSS200		GCTGGGAACCGTCCAATCAGGAACGCAGCTGGTGCGGATAGGGCGGCTTCCGGGATGTGG[CG]GGGCCTTTGTCTCTCGCTGCAGCCTGAGCTCTAGGTCTTGTTTTCCCTGCTTTGTGTTTT
